# Supplementary material
Source: publisher site journal article supplement (http://www.dovepress.com/get_supplementary_file.php?f=230693.docx)
Supplement: Supplementary file 1 [file get_supplementary_file.php]

# Supporting materials

The CDS region sequence of ING4: atggctg cggggatgta tttggaacat tatctggaca gtattgaaaa ccttcccttt gaattacaga gaaactttca gctcatgagg gacctagacc aaagaacaga ggacctgaag gctgaaattg acaagttggc cactgagtat atgagtagtg cccgcagcct gagctccgag gaaaaattgg cccttctcaa acagatccag gaagcctatg gcaagtgcaa ggaatttggt gacgacaagg tgcagcttgc catgcagacc tatgagatgg tggacaaaca cattcggcgg ctggacacag acctggcccg ttttgaggct gatctcaagg agaaacagat tgagtcaagt gactatgaca gctcttccag caaaggcaaa aagaaaggcc ggactcaaaa ggagaagaaa gctgctcgtg ctcgttccaa agggaaaaac tcggatgaag aagcccccaa gactgcccag aagaagttaa agctcgtgcg cacaagtcct gagtatggga tgccctcagt gacctttggc agtgtccacc cctctgatgt gttggatatg cctgtggatc ccaacgaacc cacctattgc ctttgtcacc aggtctccta tggagagatg attggctgtg acaaccctga ttgttccatt gagtggttcc attttgcctg tgtggggctg acaaccaagc ctcgggggaa atggttttgc ccacgctgct cccaagaacg gaagaagaaa tag

The CDS region sequence of Il-24: tgaattttcaa cagaggctgc aaagcctgtg gactttagcc agcagaccct tctgccctcc tttgctggcg acagcctctc aaatgcagat ggttgtgctc ccttgcctgg gttttaccct gcttctctgg agccaggtat caggggccca gggccaagaa ttccactttg ggccctgcca agtgaagggg gttgttcccc agaaactgtg ggaagccttc tgggctgtga aagacactat gcaagctcag gataacatca cgagtgcccg gctgctgcag caggaggttc tgcagaacgt ctcggatgct gagagctgtt accttgtcca caccctgctg gagttctact tgaaaactgt tttcaaaaac taccacaata gaacagttga agtcaggact ctgaagtcat tctctactct ggccaacaac tttgttctca tcgtgtcaca actgcaaccc agtcaagaaa atgagatgtt ttccatcaga gacagtgcac acaggcggtt tctgctattc cggagagcat tcaaacagtt ggacgtagaa gcagctctga ccaaagccct tggggaagtg gacattcttc tgacctggat gcagaaattc tacaagctct
